# Supplementary material for: Functional isocoumarin-containing polymers synthesized by rhodium-catalyzed oxidative polycoupling of aryl diacid and internal diyne
Source: Royal Society of Chemistry journal article supplement (doi:10.1039/c6py00206d), 2016-01-01
Supplement: c6py00206d1.pdf [file c6py00206d1.pdf]

Electronic Supporting Information

# Functional isocoumarin-containing polymers synthesized by rhodium-catalyzed oxidative polycoupling of aryl diacid and internal diyne

Ting Han,<sup>ab</sup> Haiqin Deng,<sup>ab</sup> Chris Y. Y. Yu,<sup>ab</sup> Chen Gui,<sup>ab</sup> Zhegang Song,<sup>ab</sup> Ryan T.

K. Kowk,<sup>ab</sup> Jacky W. Y. Lam,<sup>\*ab</sup> and Ben Zhong Tang<sup>\*abc</sup>

<sup>a</sup> HKUST-Shenzhen Research Institute, No. 9 Yuexing 1st RD, South Area, Hi-tech Park, Nanshan, Shenzhen 518057, China

<sup>b</sup> Department of Chemistry, Hong Kong Branch of Chinese National Engineering Research Center for Tissue Restoration and Reconstruction, Institute for Advanced Study, Institute of Molecular Functional Materials, Division of Biomedical Engineering, Division of Life Science and State Key Laboratory of Molecular Neuroscience, The Hong Kong University of Science & Technology, Clear Water Bay, Kowloon, Hong Kong

<sup>c</sup> Guangdong Innovative Research Team, SCUT-HKUST Joint Research Laboratory, State Key Laboratory of Luminescent Materials and Devices, South China University of Technology, Guangzhou 510640, China

## Table of Contents

**Table S1** Solvent effect on the polymerization of **1** and **2**.

**Fig. S1**  $^1\text{H}$  NMR spectrum of **3b** in chloroform-*d*.

**Fig. S2**  $^{13}\text{C}$  NMR spectrum of **3b** in chloroform-*d*.

**Fig. S3** High-resolution mass spectrum of **3b**.

**Fig. S4** ORTEP drawing of single crystals of **3b** (CCDC 1043916).

**Table S2** Crystal data and structure refinement for model compound **3b**.

**Fig. S5** TGA thermogram of **P1/2** recorded under nitrogen at a heating rate of 10 °C/min.

**Fig. S6** DSC thermogram of **P1/2** recorded under nitrogen during the second heating cycle at a heating rate of 10 °C/min.

**Fig. S7** Size distributions of nanoparticles of **P1/2** suspended in THF/water mixtures with (A) 70 vol %, (B) 80 vol %, and (C) 99 vol % water fractions. Concentration: 10  $\mu\text{M}$ .

**Table S3** Refractive indices and chromatic dispersions of **P1/2**.

**Table S1** Solvent effect on the polymerization of **1** and **2**<sup>a</sup>

| Entry          | Solvent          | Yield (%) | $M_w^b$ | $M_w/M_n^b$ |
|----------------|------------------|-----------|---------|-------------|
| 1 <sup>c</sup> | DMF              | 88.1      | 26 300  | 2.95        |
| 2              | <i>o</i> -DCB    | Trace     |         |             |
| 3              | DMSO             | Trace     |         |             |
| 4              | <i>o</i> -xylene | Trace     |         |             |

<sup>a</sup> Carried out in air at 120 °C for 24 h in the presence of  $[\text{Cp}^*\text{RhCl}_2]_2$  and  $\text{Cu}(\text{OAc})_2 \cdot \text{H}_2\text{O}$ .  $[\mathbf{1}] = 0.10 \text{ M}$ ,  $[\mathbf{2}] = 0.10 \text{ M}$ ,  $[\text{Rh}] = 0.002 \text{ M}$ ,  $[\text{Cu}] = 0.005 \text{ M}$ . <sup>b</sup> Determined by GPC in THF on the basis of a linear polystyrene calibration. <sup>c</sup> Data taken from Table 3, entry 2.

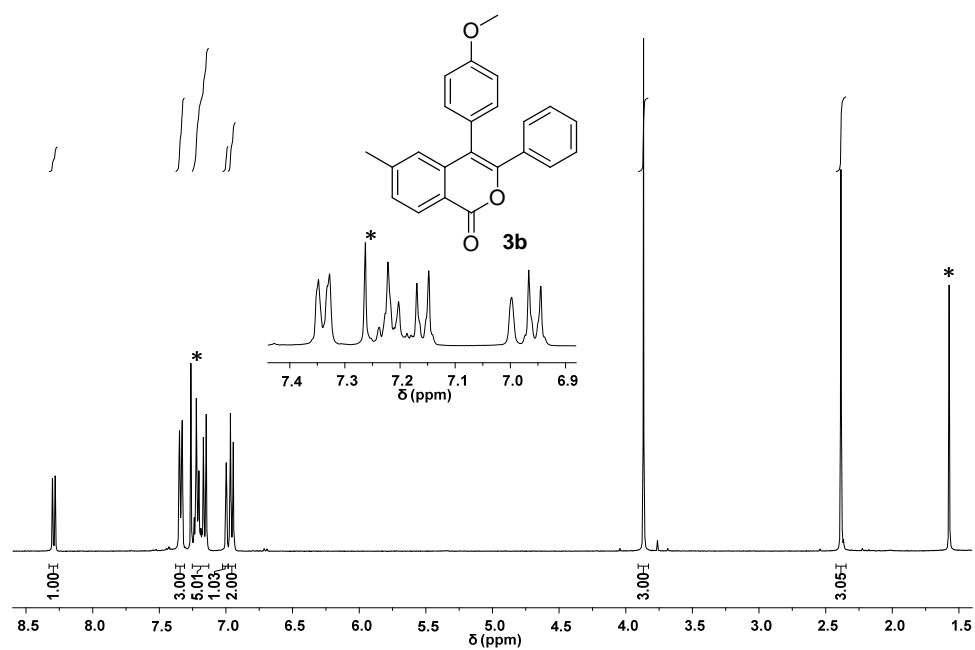

**Fig. S1** <sup>1</sup>H NMR spectrum of **3b** in chloroform-*d*.

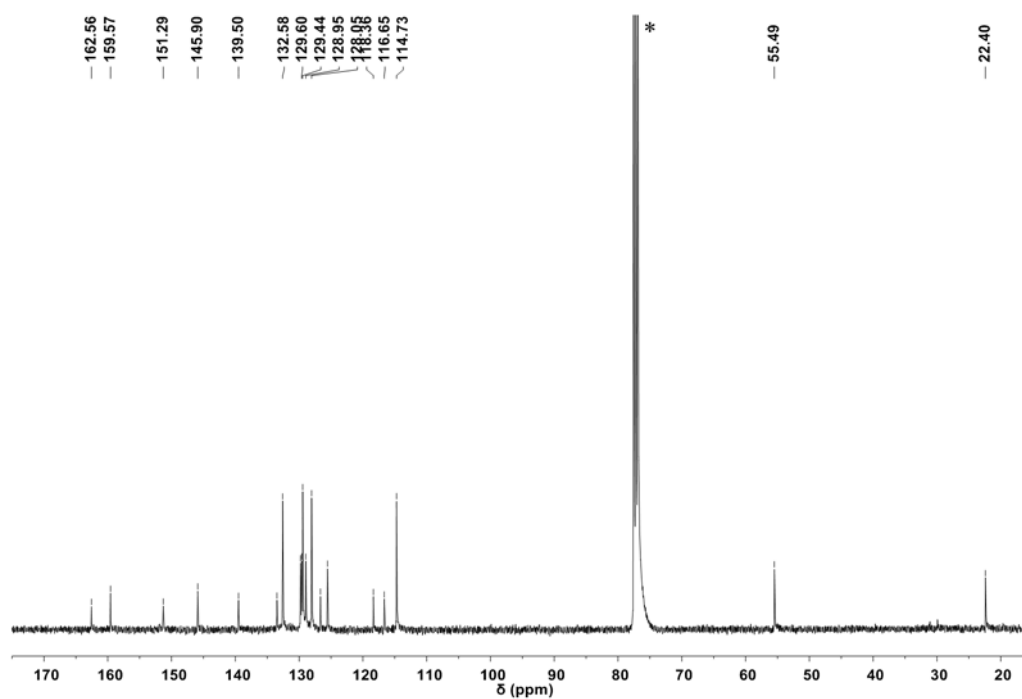

**Fig. S2** <sup>13</sup>C NMR spectrum of **3b** in chloroform-*d*.

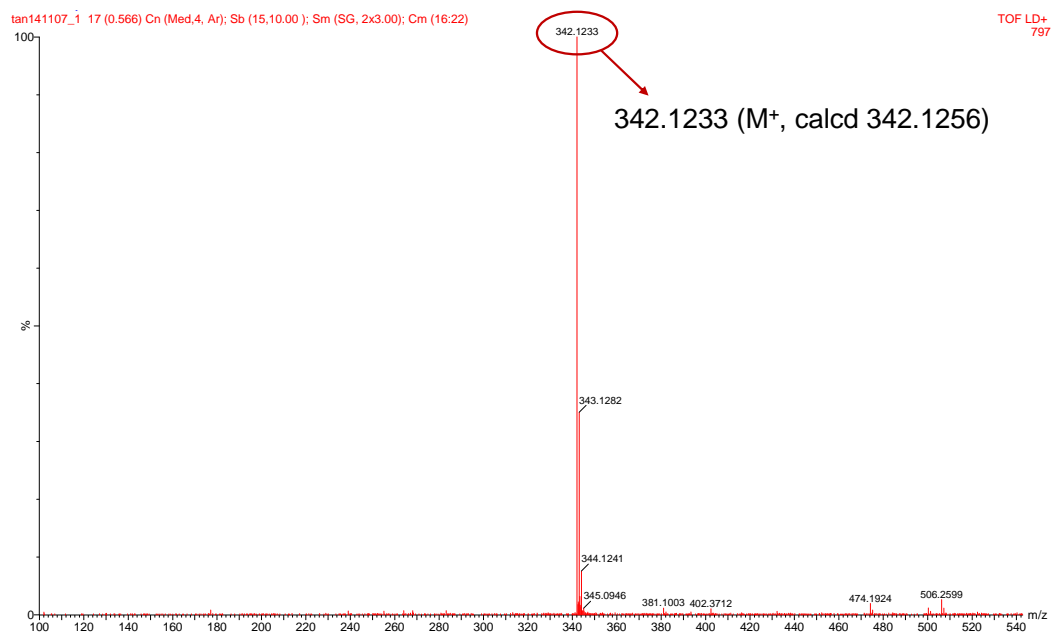

**Fig. S3** High-resolution mass spectrum of **3b**.

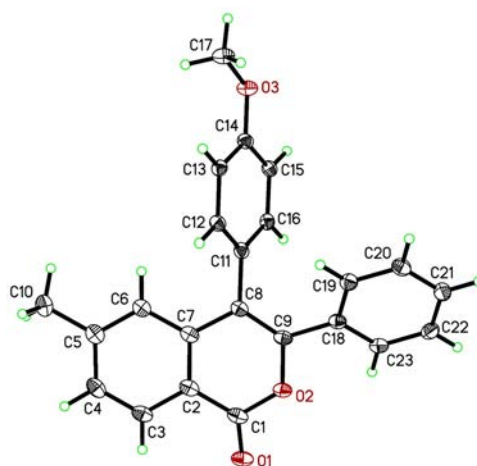

**Fig. S4** ORTEP drawing of single crystals of **3b** (CCDC 1043916).

**Table S2** Crystal data and structure refinement for model compound **3b**

|                                   |                                                                                                            |
|-----------------------------------|------------------------------------------------------------------------------------------------------------|
| Empirical formula                 | C <sub>23</sub> H <sub>18</sub> O <sub>3</sub>                                                             |
| Formula weight                    | 342.37                                                                                                     |
| Temperature                       | 99.9(4) K                                                                                                  |
| Wavelength                        | 1.5418 Å                                                                                                   |
| Crystal system                    | Monoclinic                                                                                                 |
| Space group                       | Pc                                                                                                         |
| Unit cell dimensions              | a = 5.82646(9) Å     α = 90°.<br>b = 9.44106(13) Å     β = 100.1098(15)°.<br>c = 15.6160(3) Å     γ = 90°. |
| Volume                            | 845.67(2) Å <sup>3</sup>                                                                                   |
| Z, Calculated density             | 2, 1.345 Mg/m <sup>3</sup>                                                                                 |
| Absorption coefficient            | 0.707 mm <sup>-1</sup>                                                                                     |
| F(000)                            | 360                                                                                                        |
| Crystal size                      | 0.20 x 0.18 x 0.05 mm <sup>3</sup>                                                                         |
| Theta range for data collection   | 4.68 to 67.47°.                                                                                            |
| Index ranges                      | -6 ≤ h ≤ 5, -11 ≤ k ≤ 10, -17 ≤ l ≤ 18                                                                     |
| Reflections collected             | 4507                                                                                                       |
| Independent reflections           | 2180 [R(int) = 0.0120]                                                                                     |
| Completeness to theta = 66.50°    | 99.63%                                                                                                     |
| Max. and min. transmission        | 1.00000 and 0.87146                                                                                        |
| Refinement method                 | Full-matrix least-squares on F <sup>2</sup>                                                                |
| Data / restraints / parameters    | 2180 / 2 / 237                                                                                             |
| Goodness-of-fit on F <sup>2</sup> | 1.001                                                                                                      |
| Final R indices [I > 2σ(I)]       | R1 = 0.0221, wR2 = 0.0557                                                                                  |
| R indices (all data)              | R1 = 0.0222, wR2 = 0.0558                                                                                  |
| Largest diff. peak and hole       | 0.104 and -0.131 e.Å <sup>-3</sup>                                                                         |

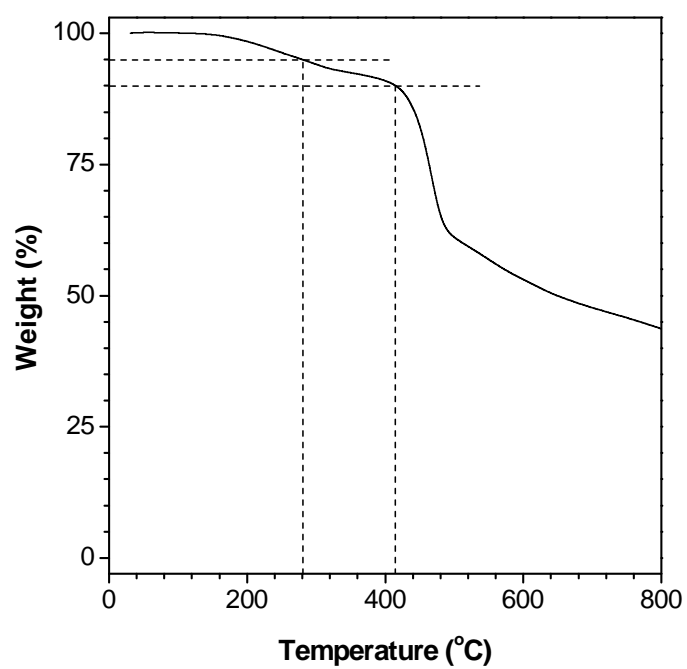

**Fig. S5** TGA thermogram of P1/2 recorded under nitrogen at a heating rate of 10 °C/min.

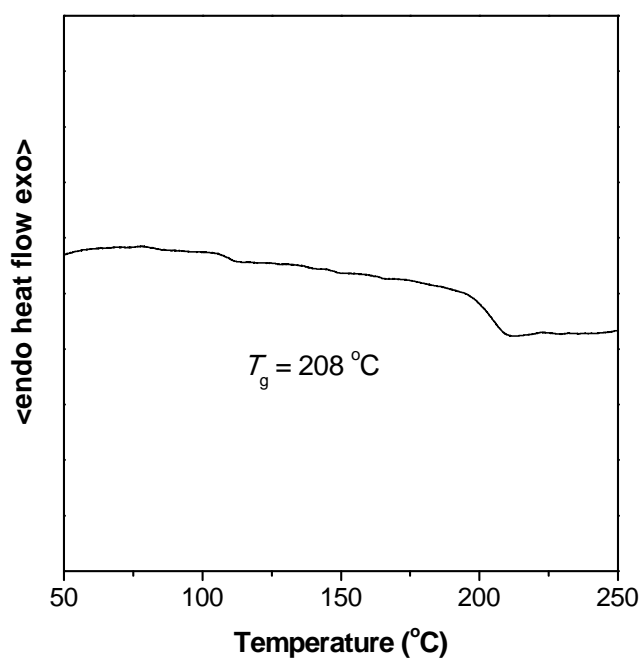

**Fig. S6** DSC thermogram of P1/2 recorded under nitrogen during the second heating cycle at a heating rate of 10 °C/min.

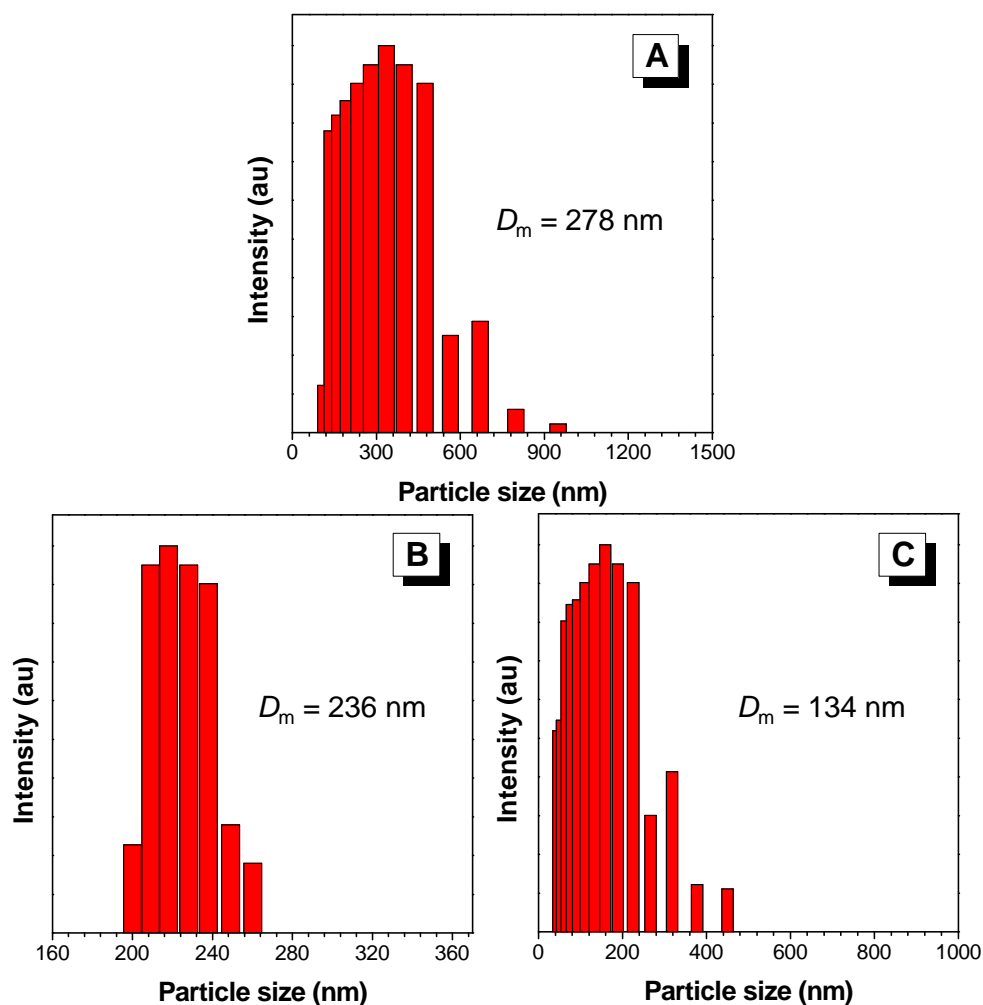

**Fig. S7** Size distributions of nanoparticles of P1/2 suspended in THF/water mixtures with (A) 70 vol %, (B) 80 vol % and (C) 99 vol % water fractions. Concentration: 10  $\mu$ M.

**Table S3** Refractive indices and chromatic dispersions of P1/2<sup>a</sup>

| Entry | Time (min) | $n_{632.8}$ | $\nu_D$ | $D$    |
|-------|------------|-------------|---------|--------|
| 1     | 0          | 1.6920      | 7.7333  | 0.1293 |
| 2     | 10         | 1.6466      | 15.8475 | 0.0631 |
| 3     | 30         | 1.6304      | 16.0146 | 0.0624 |
| 4     | 40         | 1.6174      | 17.9358 | 0.0558 |

<sup>a</sup> Abbreviation:  $n$  = refractive index,  $\nu_D$  = Abbé number =  $(n_D - 1)/(n_F - n_C)$ , where  $n_D$ ,  $n_F$  and  $n_C$  are the  $n$  values at wavelengths of Fraunhofer D, F and C spectral lines of 589.2, 486.1 and 656.3 nm, respectively;  $D$  = chromatic dispersion =  $1/\nu_D$ .
